# Supplementary material for: Transparent fluoride glass-ceramics with phase-selective crystallization for middle IR photonics
Source: Royal Society of Chemistry journal article supplement (doi:10.1039/d2tc02627a), 2022-01-01
Supplement: d2tc02627a1.pdf [file d2tc02627a1.pdf]

## Transparent Fluoride Glass-Ceramics with Phase-Selective Crystallization for Middle IR Photonics

Longfei Zhang<sup>a,b,†</sup> Yang Sun<sup>c,d,†</sup> Yiguang Jiang<sup>\*a</sup> Bo Da<sup>e</sup> Juan Du<sup>a,f</sup> Shuaipeng Wang<sup>a</sup> Sisheng Qi<sup>a</sup> Zhiyong Yang<sup>a</sup> Long Zhang<sup>\*a,f</sup> and Jin He<sup>\*a,f</sup>

<sup>a</sup> Key Laboratory of Materials for High Power Lasers and State Key Laboratory of High Field Laser Physics, Shanghai Institute of Optics and Fine Mechanics, Chinese Academy of Sciences, Shanghai 201800, China

<sup>b</sup> Center of Materials Science and Optoelectronics Engineering, University of Chinese Academy of Sciences, Beijing 100049, China

<sup>c</sup> Department of Applied Physics and Applied Mathematics, Columbia University, New York, NY 10027, USA

<sup>d</sup> Department of Physics, Iowa State University, Ames, IA 50011, USA

<sup>e</sup> Research and Services Division of Materials Data and Integrated System, National Institute for Materials Science, 1-1 Namiki, Tsukuba, Ibaraki 305-0044, Japan

<sup>f</sup> Hangzhou Institute for Advanced Study, UCAS, Hangzhou, Zhejiang 310024, China

<sup>†</sup> Longfei Zhang and Yang Sun contributed equally to this work.

## 1. Design Principles for Selective Phase-separation Engineering

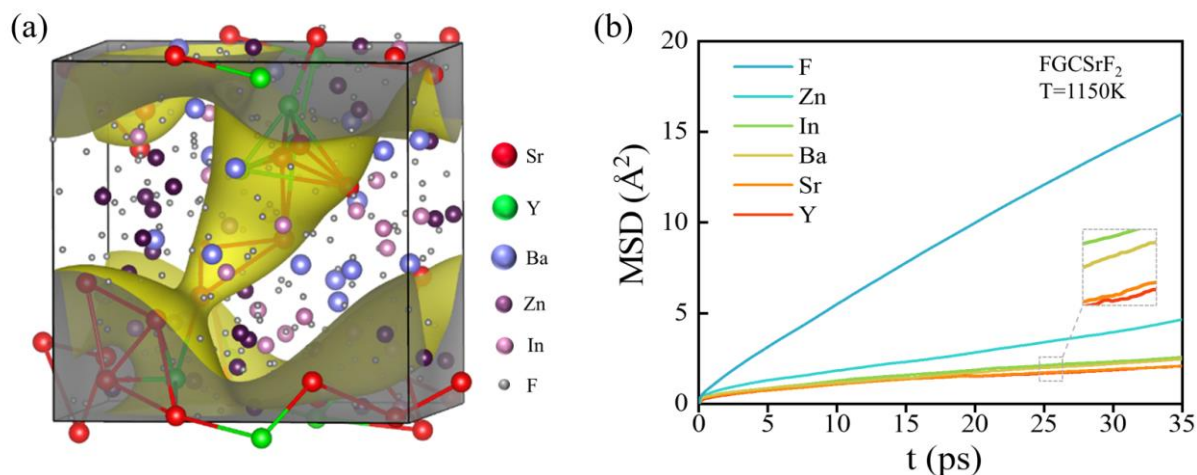

**Figure S1** (a) Atomic isosurface from AIMD simulation of FGCSrF<sub>2</sub> at T=1150K; (b) Atomic diffusion coefficient in the FGCSrF<sub>2</sub> melt at 1150K.

## 2. Crystallization kinetics and thermodynamic parameters of FGCs

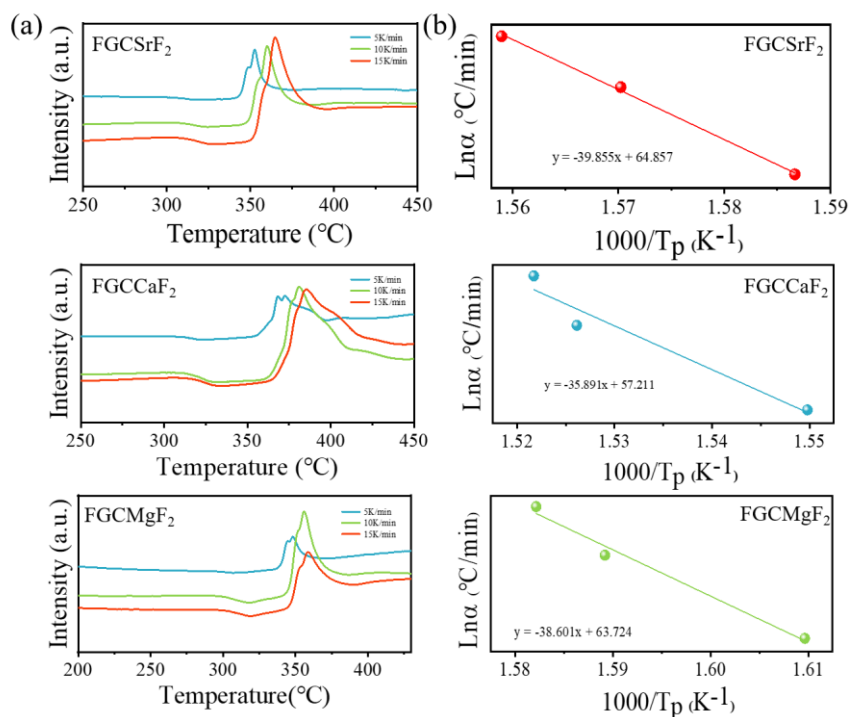

**Figure S2** (a) DTA curves under heating rate at 5K/min, 10K/min, and 15K/min for FGCs; (b) the relationship of  $\text{Ln}\alpha$  between  $1/T_p$ .

The calculation of crystallization activation energy is based on Owaza equation and evolved from AMT equation:

$$\text{Ln}\alpha = -E/RT_p + C$$

where  $\alpha$  is the heating rate of DTA analysis.  $T_p$  is the exothermic peak temperature of crystallization, which can read from Fig.S2a.  $C$  is a constant.  $R$  is the gas constant, which equals 8.31441 J/mol·K. Accordingly, the slope ( $-E/R$ ) of the curve can be obtained by plotting according to the equation, as shown in Fig.S2b. Therefore, the crystallization activation energy ( $E_c$ ) can be calculated, and the values are presented in **Table S1**.

**Table S1** The crystallization activation energy ( $E_c$ ) of FGCs.

|                     | -E/R    | R(J/mol·K) | E(KJ/mol) |
|---------------------|---------|------------|-----------|
| FGCSrF <sub>2</sub> | -39.855 | 8.31441    | 332       |
| FGCCaF <sub>2</sub> | -38.601 | 8.31441    | 330       |
| FGCMgF <sub>2</sub> | -35.891 | 8.31441    | 310.3     |

### 3. Mechanical properties and corrosion resistance of FGCs

**Table S2** Corrosion resistance and Vickers hardness of FGCs and FGInF<sub>3</sub>.

|                     | Corrosion resistance test |          |                | Vickers hardness (HV) |
|---------------------|---------------------------|----------|----------------|-----------------------|
|                     | Before(g)                 | After(g) | $\Delta W(\%)$ |                       |
| FGInF <sub>3</sub>  | 0.4886                    | 0.4840   | 0.94%          | 262                   |
| FGCSrF <sub>2</sub> | 0.3143                    | 0.3132   | 0.06%          | 273                   |
| FGCCaF <sub>2</sub> | 0.6784                    | 0.6770   | 0.21%          | 314                   |
| FGCMgF <sub>2</sub> | 0.7809                    | 0.7752   | 0.73%          | 290                   |

### 4. Refractive index matching degree of two phases in FGCs

**Table S3** Refractive index of single crystal (SrF<sub>2</sub>, CaF<sub>2</sub>, MgF<sub>2</sub>) and glass matrix at different wavebands(nm).

|                  | 750   | 1000  | 2000  | 3000  | 5000  |
|------------------|-------|-------|-------|-------|-------|
| SrF <sub>2</sub> | 1.435 | 1.433 | 1.429 | 1.425 | 1.412 |
| CaF <sub>2</sub> | 1.431 | 1.429 | 1.424 | 1.418 | 1.400 |
| MgF <sub>2</sub> | 1.375 | 1.373 | 1.368 | 1.360 | 1.340 |
| Glass            | 1.487 | 1.485 | 1.482 | 1.480 | 1.479 |

(Refractive index data of single crystal and glass matrix are only approximate values, because the refractive index changed as the entrance of other cations in the crystal phase.)

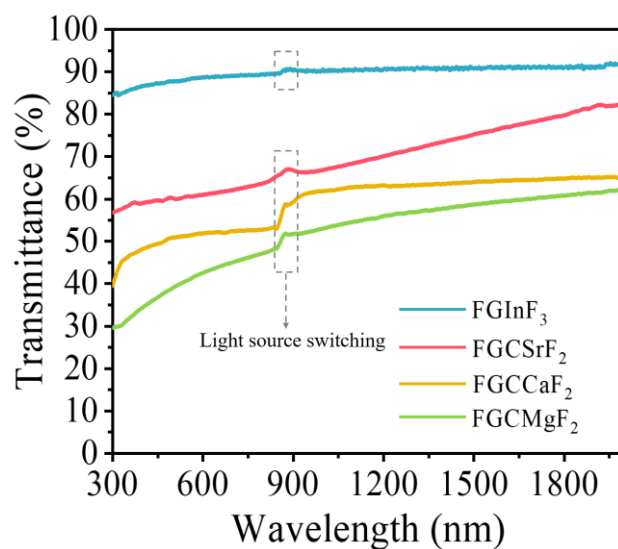

**Figure S3** Transmittance in the range of 300 to 2000 nm of FGCs and fluorindate glass.

5. Control experiment of phase-selective crystallization

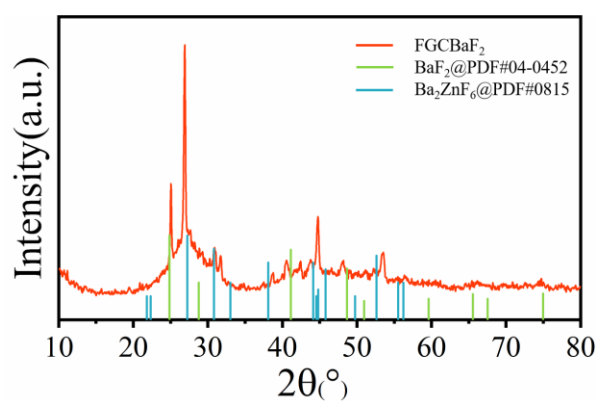

**Figure S4.** XRD patterns of FGCBaF<sub>2</sub>, PDF#04-0452 of BaF<sub>2</sub> crystal, and PDF#21-0815 of Ba<sub>2</sub>ZnF<sub>6</sub> crystal.

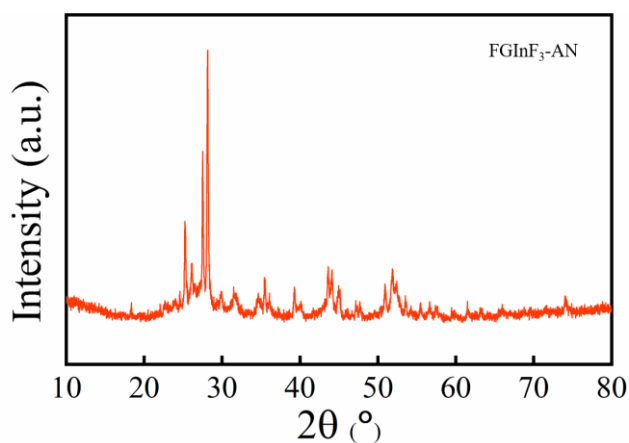

**Figure S5** XRD pattern of FGInF<sub>3</sub> after classical quenching-annealing-crystallization route.

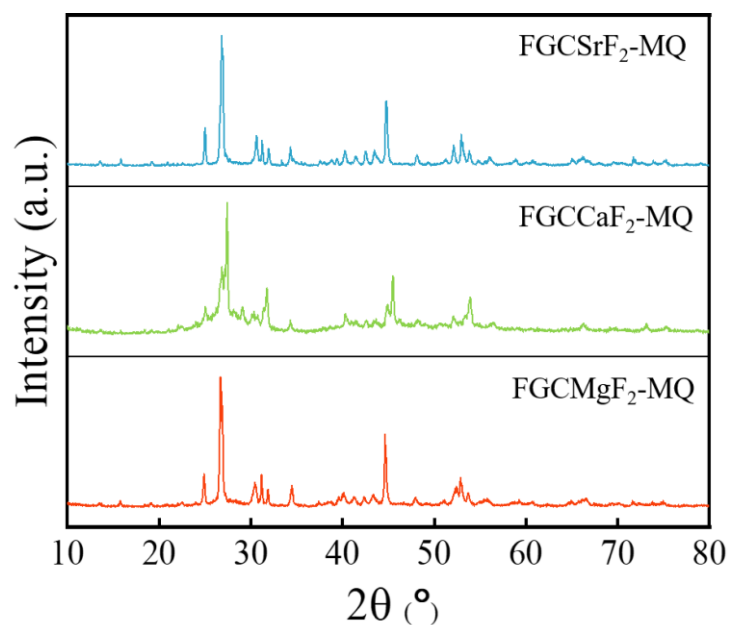

**Figure S6** XRD patterns of FGCs samples obtained by traditional one-side melt-quenching.

## 6. The structure of the FGCs

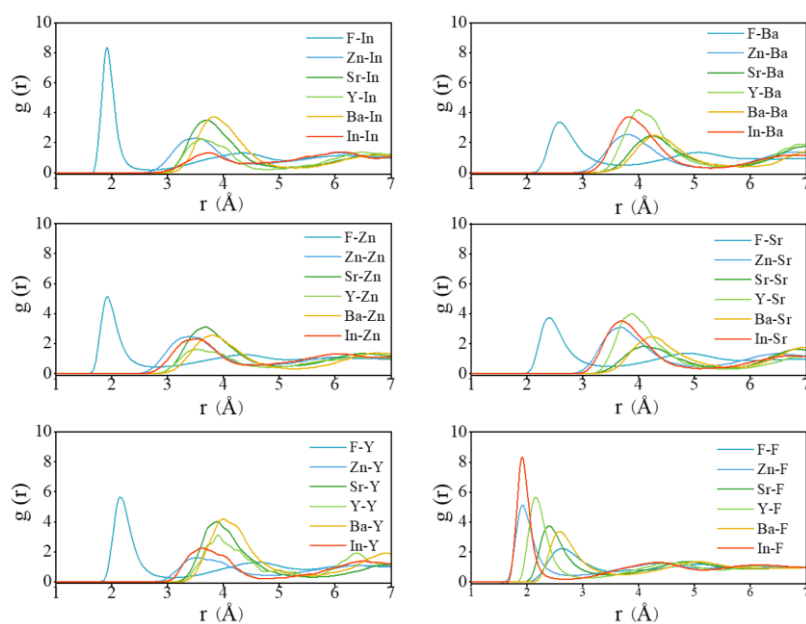

**Figure S7** Pair correlation function at 1150K of FGCSrF<sub>2</sub>.

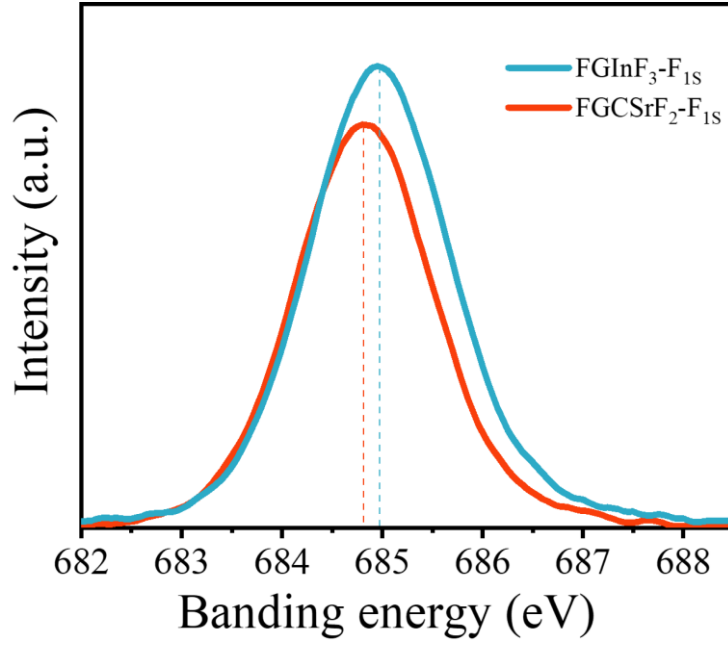

**Figure S8** F-1s XPS peak profiles of FGCSrF<sub>2</sub> and FGInF<sub>3</sub>.

7. The UC lifetimes of the FGCs and FGInF<sub>3</sub>

Analysis of the upconversion luminescence transient for the  $^4S_{3/2} \rightarrow ^4I_{15/2}$  was performed using a best-fit analysis that employed the relationship<sup>1</sup>:

$$I_t = I_0 + A_1 \exp(-t / \tau_1) + A_2 \exp(-t / \tau_2) + A_3 \exp(-t / \tau_3) \quad (1)$$

Where A is fitting parameters,  $\tau$  is the decay constant. The fitting results are presented in

**Figure S4**. The average lifetimes  $\tau$  are obtained by:

$$\tau = \frac{A_1 \tau_1^2 + A_2 \tau_2^2 + A_3 \tau_3^2}{A_1 \tau_1 + A_2 \tau_2 + A_3 \tau_3} \quad (2)$$

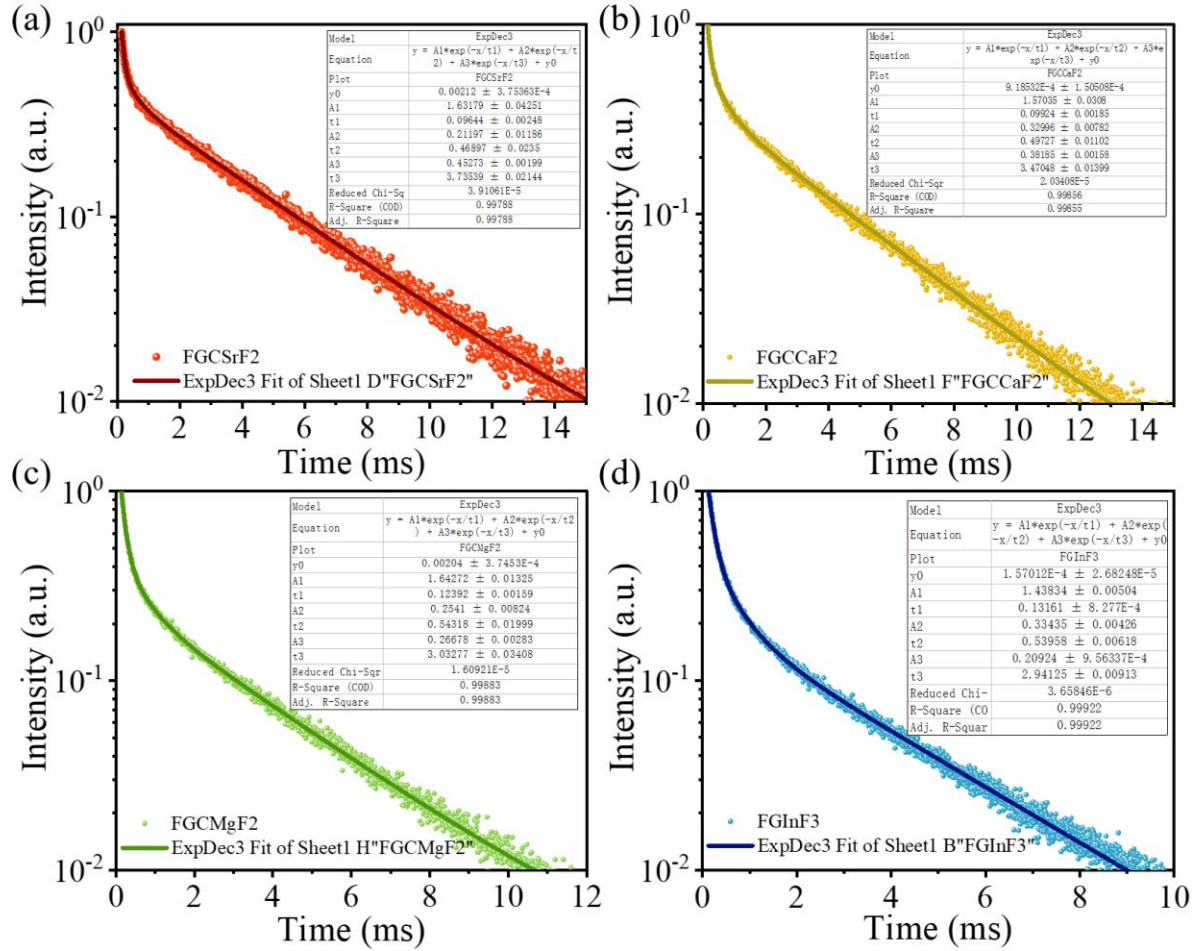

**Figure S9** The decay curves of  $\text{Er}^{3+}: 4\text{S}_{3/2}$  of the (a)FGCSrF<sub>2</sub>, (b)FGCCaF<sub>2</sub>, (c)FGCMgF<sub>2</sub>, and (d)FGInF<sub>3</sub>.

**Table S4** Lifetime-related data of FGCs and FGInF<sub>3</sub>.

|                     | A <sub>1</sub> | t <sub>1</sub> (ms) | A <sub>2</sub> | t <sub>2</sub> (ms) | A <sub>3</sub> | t <sub>3</sub> (ms) | τ (ms)         |
|---------------------|----------------|---------------------|----------------|---------------------|----------------|---------------------|----------------|
| FGCSrF <sub>2</sub> | 1.6318         | 0.0964              | 0.2120         | 0.4690              | 0.4527         | 3.7354              | <b>3.27471</b> |
| FGCCaF <sub>2</sub> | 1.5704         | 0.0992              | 0.3300         | 0.4973              | 0.3819         | 3.4705              | <b>2.85459</b> |
| FGCMgF <sub>2</sub> | 1.6427         | 0.1239              | 0.254          | 0.5432              | 0.2668         | 3.0328              | <b>2.21954</b> |
| FGInF <sub>3</sub>  | 1.4383         | 0.1316              | 0.3344         | 0.5396              | 0.2092         | 2.9413              | <b>1.96154</b> |

Reference:

1. L. Gomes, V. Fortin, M. Bernier, F. Maes, R. Vallée, S. Poulain, M. Poulain and S. D. Jackson, *Opt. Mater.*, 2017, **66**, 519-526.
